# Supplementary material
Source: PubMed Central journal article supplement (PMC3017169)
Supplement: 1012612107_pnas.1012612107_SI.pdf [file 1012612107_pnas.1012612107_SI.pdf]

# Supporting Information

Johansson et al. 10.1073/pnas.1012612107

## SI Text

**SI Methods. Data evaluation.** When a ternary complex, consisting of EF-Tu, aa-tRNA, and GTP, reacts with an initiated 70S ribosome, a series of events take place (1). As shown in Fig. 3A the time evolution of peptide bond formation in the single-round experiments used here, has a sigmoidal look, due to two or more chemical steps with kinetics in the same time scale. As we have shown earlier, it is correct to evaluate the results from this type of experiment using mean-time calculations (2). By simply integrating the area, up to one, above a normalized time course of e.g., dipeptide formation, the mean-time of the overall reaction is achieved, i.e.:

$$\tau_{\text{dip}} = \int_0^{\infty} \left(1 - \frac{\text{dip}(t)}{\text{dip}(\infty)}\right) dt. \quad [\text{S1}]$$

Similarly, the average time for GTP hydrolysis,  $\tau_{\text{GTP}}$ , is:

$$\tau_{\text{GTP}} = \int_0^{\infty} \left(1 - \frac{\text{GDP}(t)}{\text{GDP}(\infty)}\right) dt. \quad [\text{S2}]$$

For the simplified scheme in Fig. 1, the difference between  $\tau_{\text{dip}}$  and  $\tau_{\text{GTP}}$ ,  $\tau_{\text{pep}}$ , can be expressed from the individual rate constants as:

$$\tau_{\text{pep}} = \tau_{\text{dip}} - \tau_{\text{GTP}} = \frac{1}{k_{\text{tu}}} + \frac{1}{k_{\text{ac}}} + \frac{1}{k_{\text{pt}}}. \quad [\text{S3}]$$

If release of EF-Tu-GDP occurs in parallel with accommodation (1), then the term  $1/k_{\text{tu}}$  is excluded from the right hand side of Eq. S3. In our experiments we were interested in the steps subsequent to hydrolysis of EF-Tu-bound GTP. Accordingly we monitored the time evolution of GTP hydrolysis and dipeptide formation in the very same experiment (Fig. 3A). The time course of GTP hydrolysis, including binding of  $T_3$  to 70S ribosomes, codon-anticodon recognition, GTPase activation, and GTP hydrolysis (1), could in all cases be excellently fitted to a single exponential expression. With  $bg$  a constant background, the mean-time for GTP hydrolysis,  $\tau_{\text{GTP}}$ , was estimated from:

$$\text{GTP}(t) = P(1 - e^{-\frac{t}{\tau_{\text{GTP}}}}) + bg. \quad [\text{S4}]$$

The standard deviation,  $\sigma_{\tau_{\text{GTP}}}$ , of  $\tau_{\text{GTP}}$  was provided by the fitting program [Levenberg-Marquardt algorithm fit using Origin (OriginLab Corp.)]. For dipeptide formation, the curves were fitted to a two-step reaction model containing the mean-time for dipeptide formation,  $\tau_{\text{dip}}$ , as one of the parameters:

$$\begin{aligned} \text{dip}(t) = & \frac{R_0}{k_1 - \frac{1}{\tau_{\text{dip}} - 1/k_1}} \left( k_1 \cdot \left( 1 - e^{-\frac{t}{\tau_{\text{dip}} - 1/k_1}} \right) \right. \\ & \left. - \frac{1}{\tau_{\text{dip}} - 1/k_1} (1 - e^{-k_1 t}) \right) + bg. \end{aligned} \quad [\text{S5}]$$

The use of  $\tau_{\text{dip}}$  rather than the second rate constant in the model allowed us to obtain an estimate of the standard deviation,  $\sigma_{\tau_{\text{dip}}}$ , of  $\tau_{\text{dip}}$  directly from the fit as in the case of  $\sigma_{\tau_{\text{GTP}}}$ . The mean-time for all the steps subsequent to GTP hydrolysis up to peptidyl transfer,  $\tau_{\text{pep}}$ , was estimated as:

$$\tau_{\text{pep}} = \tau_{\text{dip}} - \tau_{\text{GTP}}. \quad [\text{S6}]$$

The standard deviation,  $\sigma_{\tau_{\text{pep}}}$ , of  $\tau_{\text{pep}}$  was estimated as:

$$\sigma_{\tau_{\text{pep}}} = \sqrt{\sigma_{\tau_{\text{dip}}}^2 + \sigma_{\tau_{\text{GTP}}}^2}. \quad [\text{S7}]$$

The corresponding reaction rate,  $k_{\text{pep}}$ , and its standard deviation,  $\sigma_{k_{\text{pep}}}$ , were estimated as:

$$k_{\text{pep}} = \frac{1}{\tau_{\text{pep}}}, \quad \sigma_{k_{\text{pep}}} = \frac{\sigma_{\tau_{\text{pep}}}}{\tau_{\text{pep}}^2}. \quad [\text{S8}]$$

All experiments were repeated at least twice. Maximum likelihood estimates of average  $k_{\text{pep}}$  values were obtained from single experiment variances ( $w_i = 1/\sigma_{k_{\text{pep}(i)}}^2$ ) by minimizing the  $\chi^2$  function:

$$\chi^2 = \sum_{i=1}^n w_i \cdot (k_{\text{pep}(i)} - k_{\text{pep}})^2, \quad [\text{S9}]$$

with respect to  $k_{\text{pep}}$ . From this expression we obtained:

$$k_{\text{pep}} = \frac{\sum_{i=1}^n w_i \cdot k_{\text{pep}(i)}}{\sum_{i=1}^n w_i}, \quad \sigma_{k_{\text{pep}}} = \frac{1}{\sqrt{\sum_{i=1}^n w_i}}. \quad [\text{S10}]$$

According to the present results with peptidyl transfer between native tRNAs, only one reacting group is being protonated when pH is changed near physiological pH, i.e., the  $\alpha$ -ammonium proton on the aminoacyl-tRNA. The pH dependence of peptidyl transfer,  $k_{\text{pt}}$  in Fig. 1, is therefore (3):

$$k_{\text{pt}} = \frac{k_{\text{pt}}^{\text{max}}}{1 + 10^{(pK_a^{\text{obs}} - \text{pH})}}. \quad [\text{S11}]$$

Here, the rate at complete protonation is assumed to be zero, in line with the current understanding of aminolysis (4, 5). From our experiments, we calculate the compounded rate constant,  $k_{\text{pep}}$ , of all steps subsequent to GTP hydrolysis as the inverse of the time  $\tau_{\text{pep}}$  (See Fig. 3A and Eq. S8 above). The parameters  $k_{\text{pep}}^{\text{max}}$  and  $pK_a^{\text{obs}}$ , in Table 1, were estimated by fitting the experimentally observed pH variation of  $k_{\text{pep}}$  to the function:

$$k_{\text{pep}} = \frac{k_{\text{pep}}^{\text{max}}}{1 + 10^{(pK_a^{\text{obs}} - \text{pH})}}. \quad [\text{S12}]$$

The observed  $pK_a^{\text{obs}}$  value is related to the  $pK_a$  value of the  $\alpha$ -amino group of a ribosome bound aa-tRNA,  $pK_a^{\text{ribo}}$ , and the "downshift term"  $\log_{10}(k_{\text{pep}}^{\text{max}}/k_{\text{pt}}^{\text{max}})$  through:

$$pK_a^{\text{obs}} = pK_a^{\text{ribo}} + \log_{10} \left( \frac{k_{\text{pep}}^{\text{max}}}{k_{\text{pt}}^{\text{max}}} \right). \quad [\text{S13}]$$

The resolution of our kinetic experiments allows precise estimates of the average times  $\tau_{\text{dip}}$ ,  $\tau_{\text{GTP}}$ , and  $\tau_{\text{pep}}$ , but not the downshift ratio  $k_{\text{pep}}^{\text{max}}/k_{\text{pt}}^{\text{max}}$  in Eq. S13 (see Discussion in the main text). When  $pK_a^{\text{ribo}}$  is equal to the  $pK_a$ -value of aminoacyl-tRNAs or their analogues in bulk water,  $pK_a^{\text{aq}}$ ,  $k_{\text{pt}}^{\text{max}}$  can be calculated from observed data and Eq. S13 as:

$$k_{\text{pt}}^{\text{max}} = k_{\text{pep}}^{\text{max}} \cdot 10^{pK_a^{\text{ribo}} - pK_a^{\text{obs}}}. \quad [\text{S14}]$$

The compounded rate constant of the steps *between* GTP hydrolysis and the chemistry of peptide bond formation can be calculated as:

$$\frac{1}{1/k_{\text{pep}}^{\text{max}} - 1/k_{\text{pt}}^{\text{max}}} \quad [\text{S15}]$$

**MD-simulated  $pK_a$ -values of A-site bound aminoacyl-tRNAs.** In order to examine the relation between the  $pK_a^{\text{obs}}$ -values (Table 1, column 3) and the physical process of ionizing the  $\alpha$ -amino group in the ribosomal A site we carried out molecular dynamics (MD) simulations of the CCA end of the six different aa-tRNAs in both the neutral and protonated form in bulk water as well as in the ribosome with a dipeptide bound to the P-site tRNA. The systems including solvent and ions were prepared using essentially the same protocols as described previously (6, 7) and comprised all residues with atoms within 20 Å of the P-site carboxyl carbon. Atoms within the system boundary were fully mobile while atoms outside the 20 Å radius were restrained to their initial positions with a 100 kcal/(mol·Å<sup>2</sup>) harmonic force constant. No nonbonded interactions outside or across the boundary was calculated and water molecules close to the boundary were restrained to reproduce the correct density and polarization (8). All nonbonded interactions were calculated for the  $\alpha$ -amine while for other interactions a multipole expansion treatment (9) of long-range electrostatics (beyond 10 Å) was employed. The different systems were heated from 1 K to 300 K in a step wise manner with initial random velocities taken from a Maxwell-Boltzmann distribution and the temperature was kept constant by coupling to an external heat bath. The MD simulations used a time step of 1 fs and the systems were equilibrated at 300 K for at least 300 ps before data collection. Data were collected every 0.1 ps for all systems during subsequent MD simulations of 4 ns each. The same set of simulations were performed for each of the six aa-tRNAs with the  $\alpha$ -amine protonated. Finally, an identical simulation scheme was repeated for each of the six amino acid esters in a 20 Å sphere of water, with the  $\alpha$ -amine both neutral and protonated.

The  $pK_a$ -shifts of the ribosome bound aa-tRNAs, relative to their unperturbed values in aqueous solution, are given by the

thermodynamic cycle corresponding to moving the neutral and protonated aa-tRNA species from water to the ribosomal A-site (Scheme S1)

Here,  $\Delta G^{\text{aq}}$  and  $\Delta G^{\text{ribo}}$  are the differences in standard free energy between the protonated and deprotonated forms of the  $\alpha$ -amino groups of aminoacyl-tRNAs in bulk water (*aq*) and ribosomal A site (*ribo*), respectively. It follows directly from the definitions of  $pK_a$ -values for ribosome bound,  $pK_a^{\text{ribo}}$ , and free,  $pK_a^{\text{aq}}$ , aminoacyl-tRNAs that:

$$\begin{aligned} RT \log 10(pK_a^{\text{ribo}} - pK_a^{\text{aq}}) &= RT \log 10 \Delta pK_a^{\text{calc}} \\ &= -(\Delta G^{\text{ribo}} - \Delta G^{\text{aq}}) = -\Delta \Delta G. \end{aligned} \quad [\text{S16}]$$

The absolute standard free energy differences  $\Delta G^{\text{ribo}}$  and  $\Delta G^{\text{aq}}$  are difficult to calculate because they in principle depend on the dielectric properties of the entire solvated ribosome. However, the relative free energies between different aa-tRNAs are easier to obtain as long-range electrostatic effects can then be expected to cancel. Here, we estimate these free energy differences by the semiempirical linear interaction (LIE) method (10) which relates the average polar and nonpolar interactions between the ionizing amino acid ester and its surroundings (i.e., the potential energy differences  $\Delta \langle U_{\text{el}} \rangle^{\text{ribo}}$ ,  $\Delta \langle U_{\text{vdw}} \rangle^{\text{ribo}}$ ,  $\Delta \langle U_{\text{el}} \rangle^{\text{aq}}$  and  $\Delta \langle U_{\text{vdw}} \rangle^{\text{aq}}$ ) to the corresponding free energy contributions. This method gives a linear relation between  $\Delta pK_a$  and the average energies are obtained, where the slope,  $\Delta \Delta pK_a^{\text{calc}}$ , is given by:

$$-1.34 \Delta \Delta pK_a^{\text{calc}} = 0.18 \Delta \Delta \langle U_{\text{vdw}} \rangle + \beta \Delta \Delta \langle U_{\text{el}} \rangle. \quad [\text{S17}]$$

Here,  $\Delta \Delta \langle U_{\text{el}} \rangle = \Delta \langle U_{\text{el}} \rangle_{\text{ribo}} - \Delta \langle U_{\text{el}} \rangle_{\text{aq}}$ ,  $\Delta \Delta \langle U_{\text{vdw}} \rangle = \Delta \langle U_{\text{vdw}} \rangle_{\text{ribo}} - \Delta \langle U_{\text{vdw}} \rangle_{\text{aq}}$ ,  $\beta$  is an electrostatic scaling constant for the surroundings of the peptidyl transferase center (PTC) and 0.18 is a standard scaling factor relating van der Waals interactions ( $\Delta \langle U_{\text{vdw}} \rangle$ ) to nonpolar free energy contributions (11), while 1.34 is  $RT \log 10$  (at 20 °C). MD simulations were used to calculate  $\Delta \Delta \langle U_{\text{vdw}} \rangle$  and  $\Delta \Delta \langle U_{\text{el}} \rangle$  for all six aminoacyl-tRNAs.

1. Pape T, Wintermeyer W, Rodnina MV (1998) Complete kinetic mechanism of elongation factor Tu-dependent binding of aminoacyl-tRNA to the A site of the *E. coli* ribosome *Embo J* 17:7490–7497.
2. Johansson M, Bouakaz E, Lovmar M, Ehrenberg M (2008) The kinetics of ribosomal peptidyl transfer revisited *Mol Cell* 30:589–598.
3. Fersht A (1999) *Structure and mechanism in protein science: a guide to enzyme catalysis and protein folding* (Freeman and Company, New York).
4. Fersht AR, Jencks WP (1970) Reactions of nucleophilic reagents with acylating agents of extreme reactivity and unreactivity. Correlation of .beta. values for attacking and leaving group variation *Journal of the American Chemical Society* 92:5442–5452.
5. Jencks WP, Carriuolo J (1960) General base catalysis of the aminolysis of phenyl acetate *Journal of the American Chemical Society* 82:675–681.
6. Trobro S, Åqvist J (2005) Mechanism of peptide bond synthesis on the ribosome *Proc Natl Acad Sci USA* 102:12395–12400.
7. Trobro S, Åqvist J (2006) Analysis of predictions for the catalytic mechanism of ribosomal peptidyl transfer *Biochemistry* 45:7049–7056.
8. Marelus J, Kolmodin K, Feierberg I, Åqvist J (1998) Q: a molecular dynamics program for free energy calculations and empirical valence bond simulations in biomolecular systems *Journal of molecular graphics & modelling* 16:213–225, 261.
9. Lee FS, Warshel A (1992) A local reaction field method for fast evaluation of long-range electrostatic interactions in molecular simulations *J Chem Phys* 97:3100–3107.
10. Åqvist J, Medina C, Samuelsson JE (1994) A new method for predicting binding affinity in computer-aided drug design *Protein engineering* 7:385–391.
11. Carlsson, J, Boukharta L, Aqvist J (2008) Combining docking, molecular dynamics and the linear interaction energy method to predict binding modes and affinities for non-nucleoside inhibitors to HIV-1 reverse transcriptase *Journal of medicinal chemistry* 51:2648–2656.

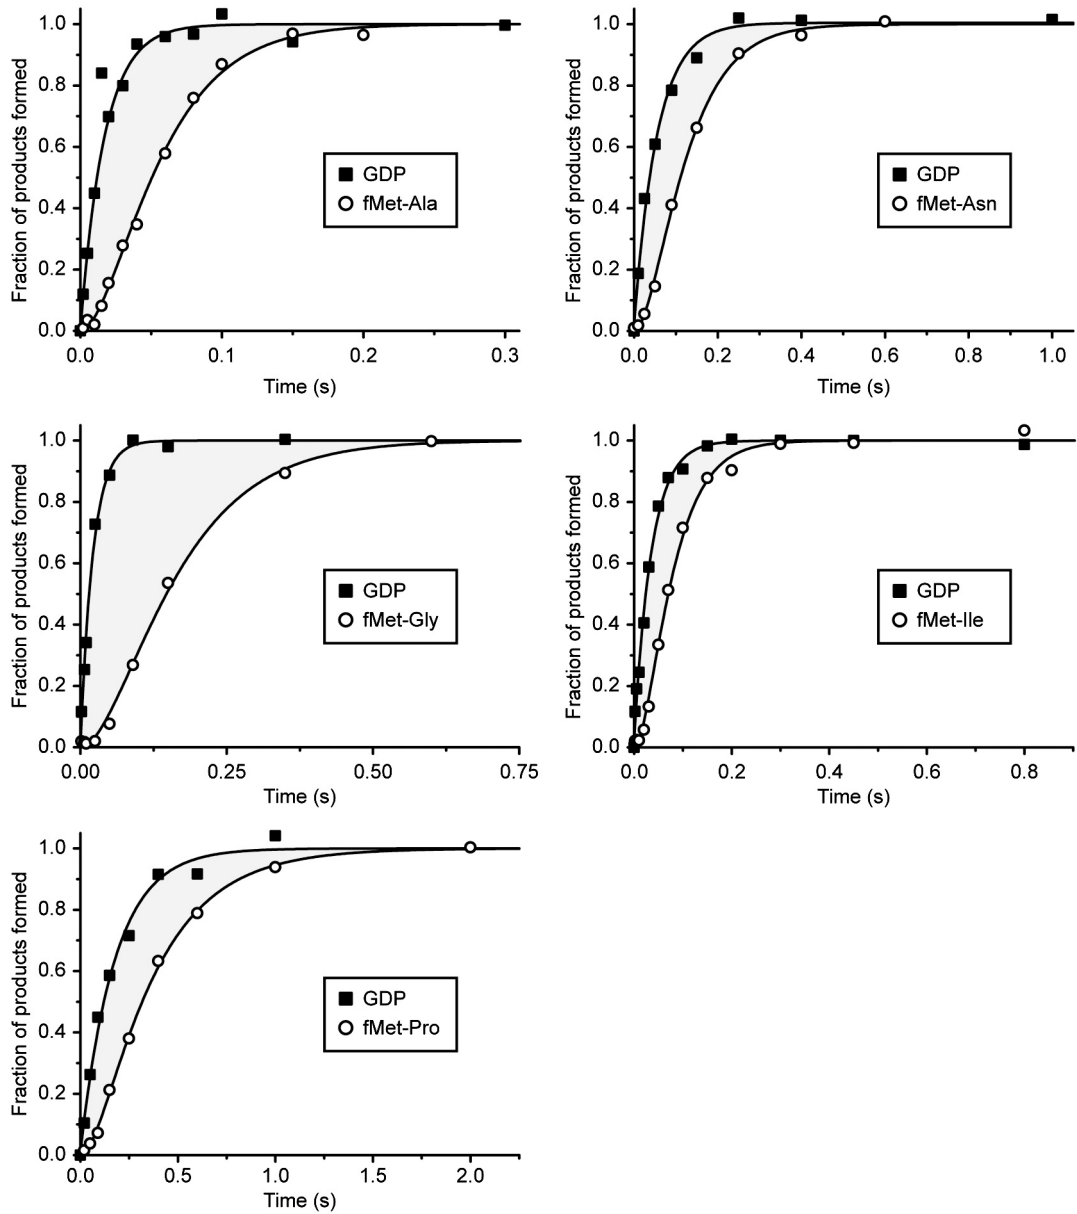

**Fig. S1.** The normalized amount of GDP and dipeptide formed as a function of time when EF-Tu-aa-tRNA- $^{[35\text{S}]}$ GTP ternary complexes (aa-tRNAs as indicated in the figure) react at  $\sim\text{pH } 7.5$  and  $20^\circ\text{C}$  with  $\text{fMet-tRNA}^{\text{Met}}$  initiated 70S ribosomes displaying GCA (Ala), AAC (Asn), GGC (Gly), AUC (Ile), or CCC (Pro) codon in A-site. The shaded areas represent the mean-time,  $\tau_{\text{pep}}$ , for all reaction steps subsequent to GTP hydrolysis up to and including peptidyl transfer.

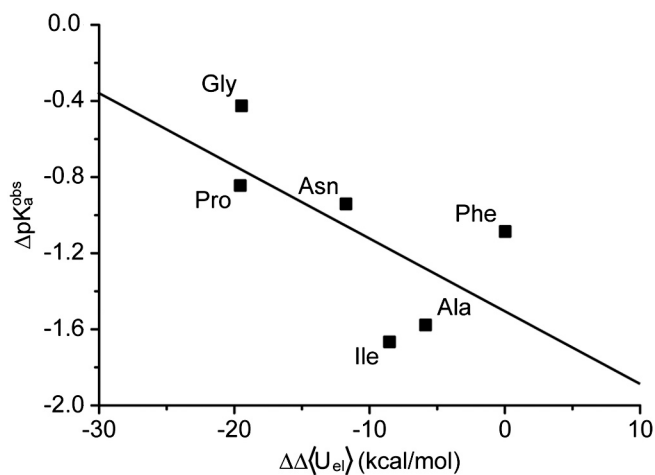

Fig. S2. MD-simulated electrostatic potential energy differences,  $\Delta\Delta(U_{el})$ , for the neutral and ionized form of the  $\alpha$ -amino group of an A-site bound or free aa-tRNA, plotted vs. experimentally observed  $pK_a$  shifts,  $\Delta pK_a^{obs} = pK_a^{obs} - pK_a^{aq}$  (Table 1). Phe-tRNA<sup>Phe</sup> is set as standard ( $=0$  kcal/mol) for the relative values of  $\Delta\Delta(U_{el})$ .

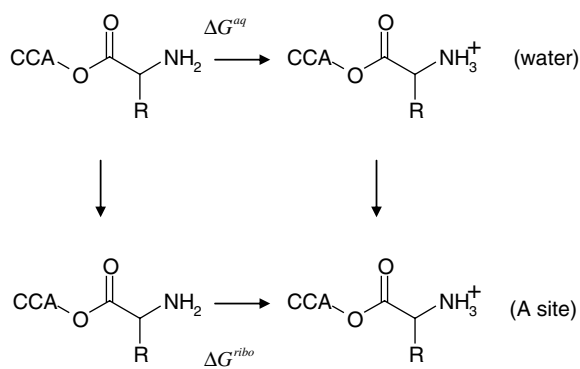

Scheme S1.
